# Supplementary material for: Comparative analyses on nitrogen removal microbes and functional genes within anaerobic–anoxic–oxic and deoxidation ditch sewage-treating processes in Wuhan and Xi’an cities, China
Source: Front Microbiol. 2024 Oct 30;15:1498681. doi: 10.3389/fmicb.2024.1498681 (PMC11557530; doi:10.3389/fmicb.2024.1498681)
Supplement: Supplementary file 2 [file Table_1.xlsx]

## Sheet: Table S1
Table S1 The metadata of activated sludge samples
Sample_name	Group	Sample_site	Volume of treated waste water (m3/day)	SampleTime	Temperature (°C)	Season	Treatment Process	sewage type	Sludge loading (kg COD/kg MLSS d-1)	SRT (d)	HRT (h)	SV30（%）	Influent pH	Influent COD (mg/L)	Influent BOD5 (mg/L)	Influent NH4+–N (mg/L)	Influent TN (mg/L)	Influent TP (mg/L)
TA.1.1	TA.1	Wuhan	60000	2018_03	14.5	Spring	A2O	Municipal wastewater	3500	18	14	36	7	190.7	86.9	28	41.4	1.4
TA.1.2	TA.1	Wuhan	60000	2018_03	14.5	Spring	A2O	Municipal wastewater	3500	18	14	36	7	190.7	86.9	28	41.4	1.4
TA.1.3	TA.1	Wuhan	60000	2018_03	14.5	Spring	A2O	Municipal wastewater	3500	18	14	36	7	190.7	86.9	28	41.4	1.4
TD.1.1	TD.1	Wuhan	40000	2018_03	14.5	Spring	DE	Municipal wastewater	4000	20	29	35	7	190.7	86.9	28	41.4	1.4
TD.1.2	TD.1	Wuhan	40000	2018_03	14.5	Spring	DE	Municipal wastewater	4000	20	29	35	7	190.7	86.9	28	41.4	1.4
TD.1.3	TD.1	Wuhan	40000	2018_03	14.5	Spring	DE	Municipal wastewater	4000	20	29	35	7	190.7	86.9	28	41.4	1.4
TA.2.1	TA.2	Wuhan	60000	2018_06	27.8	Summer	A2O	Municipal wastewater	3500	18	14	27	8.01	531.9	81.3	29.9	37.5	2.2
TA.2.2	TA.2	Wuhan	60000	2018_06	27.8	Summer	A2O	Municipal wastewater	3500	18	14	27	8.01	531.9	81.3	29.9	37.5	2.2
TA.2.3	TA.2	Wuhan	60000	2018_06	27.8	Summer	A2O	Municipal wastewater	3500	18	14	27	8.01	531.9	81.3	29.9	37.5	2.2
TD.2.1	TD.2	Wuhan	40000	2018_06	27.8	Summer	DE	Municipal wastewater	4000	20	29	27	8.01	531.9	81.3	29.9	37.5	2.2
TD.2.2	TD.2	Wuhan	40000	2018_06	27.8	Summer	DE	Municipal wastewater	4000	20	29	27	8.01	531.9	81.3	29.9	37.5	2.2
TD.2.3	TD.2	Wuhan	40000	2018_06	27.8	Summer	DE	Municipal wastewater	4000	20	29	27	8.01	531.9	81.3	29.9	37.5	2.2
TA.3.1	TA.3	Wuhan	60000	2018_10	25.1	Autumn	A2O	Municipal wastewater	3500	18	14	40	9.35	275.7	126.3	50.6	64.2	1.8
TA.3.2	TA.3	Wuhan	60000	2018_10	25.1	Autumn	A2O	Municipal wastewater	3500	18	14	40	9.35	275.7	126.3	50.6	64.2	1.8
TA.3.3	TA.3	Wuhan	60000	2018_10	25.1	Autumn	A2O	Municipal wastewater	3500	18	14	40	9.35	275.7	126.3	50.6	64.2	1.8
TD.3.1	TD.3	Wuhan	40000	2018_10	25.1	Autumn	DE	Municipal wastewater	4000	20	29	43	9.35	275.7	126.3	50.6	64.2	1.8
TD.3.2	TD.3	Wuhan	40000	2018_10	25.1	Autumn	DE	Municipal wastewater	4000	20	29	43	9.35	275.7	126.3	50.6	64.2	1.8
TD.3.3	TD.3	Wuhan	40000	2018_10	25.1	Autumn	DE	Municipal wastewater	4000	20	29	43	9.35	275.7	126.3	50.6	64.2	1.8
TA.4.1	TA.4	Wuhan	60000	2019_01	15	Winter	A2O	Municipal wastewater	3500	18	14	49	8.2	158.4	78.9	33.6	48.5	2.9
TA.4.2	TA.4	Wuhan	60000	2019_01	15	Winter	A2O	Municipal wastewater	3500	18	14	49	8.2	158.4	78.9	33.6	48.5	2.9
TA.4.3	TA.4	Wuhan	60000	2019_01	15	Winter	A2O	Municipal wastewater	3500	18	14	49	8.2	158.4	78.9	33.6	48.5	2.9
TD.4.1	TD.4	Wuhan	40000	2019_01	15	Winter	DE	Municipal wastewater	4000	20	29	51	8.2	158.4	78.9	33.6	48.5	2.9
TD.4.2	TD.4	Wuhan	40000	2019_01	15	Winter	DE	Municipal wastewater	4000	20	29	51	8.2	158.4	78.9	33.6	48.5	2.9
TD.4.3	TD.4	Wuhan	40000	2019_01	15	Winter	DE	Municipal wastewater	4000	20	29	51	8.2	158.4	78.9	33.6	48.5	2.9
BA.1.1	BA.1	Xi'an	50000	2018_03	17.8	Spring	A2O	Municipal wastewater 70% and industrial wastewater 30%	4500	11	12	43	7.27	398	170	45.6	51.4	5.9
BA.1.2	BA.1	Xi'an	50000	2018_03	17.8	Spring	A2O	Municipal wastewater 70% and industrial wastewater 29%	4500	11	12	43	7.27	398	170	45.6	51.4	5.9
BA.1.3	BA.1	Xi'an	50000	2018_03	17.8	Spring	A2O	Municipal wastewater 70% and industrial wastewater 30%	4500	11	12	43	7.27	398	170	45.6	51.4	5.9
BD.1.1	BD.1	Xi'an	100000	2018_03	17.8	Spring	DE	Municipal wastewater 70% and industrial wastewater 30%	3750	15	9	45	7.27	398	170	45.6	51.4	5.9
BD.1.2	BD.1	Xi'an	100000	2018_03	17.8	Spring	DE	Municipal wastewater 70% and industrial wastewater 30%	3750	15	9	45	7.27	398	170	45.6	51.4	5.9
BD.1.3	BD.1	Xi'an	100000	2018_03	17.8	Spring	DE	Municipal wastewater 70% and industrial wastewater 30%	3750	15	9	45	7.27	398	170	45.6	51.4	5.9
BA.2.1	BA.2	Xi'an	50000	2018_07	25.6	Summer	A2O	Municipal wastewater 70% and industrial wastewater 30%	4500	11	12	62	7.02	406	190	63.7	72.9	6.2
BA.2.2	BA.2	Xi'an	50000	2018_07	25.6	Summer	A2O	Municipal wastewater 70% and industrial wastewater 30%	4500	11	12	62	7.02	406	190	63.7	72.9	6.2
BA.2.3	BA.2	Xi'an	50000	2018_07	25.6	Summer	A2O	Municipal wastewater 70% and industrial wastewater 30%	4500	11	12	62	7.02	406	190	63.7	72.9	6.2
BD.2.1	BD.2	Xi'an	100000	2018_07	25.6	Summer	DE	Municipal wastewater 70% and industrial wastewater 30%	3750	15	9	65	7.02	406	190	63.7	72.9	6.2
BD.2.2	BD.2	Xi'an	100000	2018_07	25.6	Summer	DE	Municipal wastewater 70% and industrial wastewater 30%	3750	15	9	65	7.02	406	190	63.7	72.9	6.2
BD.2.3	BD.2	Xi'an	100000	2018_07	25.6	Summer	DE	Municipal wastewater 70% and industrial wastewater 30%	3750	15	9	65	7.02	406	190	63.7	72.9	6.2
BA.3.1	BA.3	Xi'an	50000	2018_10	18.1	Autumn	A2O	Municipal wastewater 70% and industrial wastewater 30%	4500	11	12	75	7.31	392	170	54.5	60.6	5.4
BA.3.2	BA.3	Xi'an	50000	2018_10	18.1	Autumn	A2O	Municipal wastewater 70% and industrial wastewater 30%	4500	11	12	75	7.31	392	170	54.5	60.6	5.4
BA.3.3	BA.3	Xi'an	50000	2018_10	18.1	Autumn	A2O	Municipal wastewater 70% and industrial wastewater 30%	4500	11	12	75	7.31	392	170	54.5	60.6	5.4
BD.3.1	BD.3	Xi'an	100000	2018_10	18.1	Autumn	DE	Municipal wastewater 70% and industrial wastewater 30%	3750	15	9	77	7.31	392	170	54.5	60.6	5.4
BD.3.2	BD.3	Xi'an	100000	2018_10	18.1	Autumn	DE	Municipal wastewater 70% and industrial wastewater 30%	3750	15	9	77	7.31	392	170	54.5	60.6	5.4
BD.3.3	BD.3	Xi'an	100000	2018_10	18.1	Autumn	DE	Municipal wastewater 70% and industrial wastewater 30%	3750	15	9	77	7.31	392	170	54.5	60.6	5.4
BA.4.1	BA.4	Xi'an	50000	2019_01	15.2	Winter	A2O	Municipal wastewater 70% and industrial wastewater 30%	4500	11	12	88	6.97	437	198	46.6	54.4	4.7
BA.4.2	BA.4	Xi'an	50000	2019_01	15.2	Winter	A2O	Municipal wastewater 70% and industrial wastewater 30%	4500	11	12	88	6.97	437	198	46.6	54.4	4.7
BA.4.3	BA.4	Xi'an	50000	2019_01	15.2	Winter	A2O	Municipal wastewater 70% and industrial wastewater 30%	4500	11	12	88	6.97	437	198	46.6	54.4	4.7
BD.4.1	BD.4	Xi'an	100000	2019_01	15.2	Winter	DE	Municipal wastewater 70% and industrial wastewater 30%	3750	15	9	91	6.97	437	198	46.6	54.4	4.7
BD.4.2	BD.4	Xi'an	100000	2019_01	15.2	Winter	DE	Municipal wastewater 70% and industrial wastewater 30%	3750	15	9	91	6.97	437	198	46.6	54.4	4.7
BD.4.3	BD.4	Xi'an	100000	2019_01	15.2	Winter	DE	Municipal wastewater 70% and industrial wastewater 30%	3750	15	9	91	6.97	437	198	46.6	54.4	4.7
Note:
BOD5 represents biochemical oxygen demand 5 days;
COD represents chemical oxygen demand;
SV30 represents sludge settlement in 30 min;
SRT represents sludge retention time;
HRT represents hydraulic retention time;
TN represents total nitrogen;
TP represents total phosphorus;
NH4+–N represents ammonia nitrogen.

## Sheet: Table S2
Table S3 Information about plasmid used in qPCR.
Target gene	Gene size	Plasmid size	Plasmid Concentration	Number of copies
	bp	bp	ng/µL	copies/µL
Bacteria 16S rRNA	197	2889	261.7	82600000000
AOB 16S rRNA	465	3157	249.5	72100000000
amoA	491	3183	356.8	102000000000
Nitrobacter nxrA	323	2943	399.9	121000000000
Nitrobacter nxrB	380	3015	392.3	116000000000
Nitrospira nxrB	485	3072	392.4	113000000000
nirK	165	3177	261	83300000000
nirS	413	2857	334.3	98200000000
nosZ	251	3105	164.8	51100000000
anammox 16S rRNA	282	2974	552.3	169000000000

## Sheet: Table S3
Table S4 Comparison of the estimated OUT richness and diversity indices of the 16S rRNA gene libraries for clustering at 97% identity as obtained from the pyrosequencing analysis.
Group Name	OTUs numbers	Observed species	Shannon	Simpson	Chao1	ACE	Goods coverage	PD whole tree
BA.1	2788	2416	9.038	0.995	2893.01	2905.26	0.986	224.29
BD.1	3033	2590	8.958	0.993	3219.06	3206.88	0.984	235.79
BA.2	3203	2744	9.004	0.992	3414.72	3431.04	0.982	256.6
BD.2	3027	2603	8.797	0.991	3216.91	3255.79	0.983	243.4
BA.3	2804	2424	8.923	0.992	3027.75	2944.76	0.986	231.65
BD.3	2863	2447	8.952	0.993	3040.51	3017.37	0.985	234.44
BA.4	2527	2153	8.286	0.985	2732.55	2675.18	0.986	204.39
BD.4	2561	2181	8.326	0.986	2688.49	2677.92	0.987	209.18
TA.1	1983	1711	8.125	0.986	1969.67	2048.49	0.991	165.75
TD.1	2161	1815	8.02	0.985	2306.54	2290.51	0.988	171.04
TA.2	2499	2152	8.395	0.989	2652.81	2676.49	0.987	233.29
TD.2	2431	2068	8.309	0.988	2539.14	2546.17	0.988	218.89
TA.3	2933	2519	8.778	0.991	3082.14	3081.79	0.985	231.09
TD.3	2966	2536	8.627	0.99	3226.99	3146.47	0.984	234.26
TA.4	2830	2419	8.346	0.985	3094.34	3039.13	0.984	223.92
TD.4	2786	2368	8.316	0.986	2982.33	2977.62	0.984	219.08

## Sheet: Table S4
Table S2 The absolute number of functional genes in DNA samples
Sample_name	Bacteria 16S rRNA (copies/ng)	AOB 16S rRNA (copies/ng)	AOB amoA (copies/ng)	Nitrobacter nxrA (copies/ng)	Nitrobacter nxrB (copies/ng)	Nitrospira nxrB (copies/ng)	nirS (copies/ng)	nirK (copies/ng)	nosZ (copies/ng)	Anammox 16S rRNA (copies/ng)
BA1	14000000	879	347	162	599000	885000	1070000	1390000	141000	72800
BD1	25700000	1200	518	299	1410000	875000	1000000	1860000	269000	512000
BA2	20100000	409	327	94.6	560000	947000	1030000	1510000	84000	134000
BD2	65000000	353	323	96.1	897000	252000	1060000	813000	94500	122000
BA3	45400000	575	325	130	1160000	605000	2220000	2760000	76300	323000
BD3	27400000	713	261	90.2	512000	262000	1050000	253000	84500	46600
BA4	64200000	1560	194	86.2	745000	163000	880000	203000	99400	93400
BD4	41500000	1020	286	105	550000	2300000	953000	4990000	121000	99000
TA1	25900000	1260	1140	142	755000	230000	916000	459000	387000	127000
TD1	26900000	923	814	115	710000	366000	518000	1010000	398000	118000
TA2	19400000	954	850	138	1350000	376000	1560000	1030000	121000	64600
TD2	25600000	1300	940	151	1370000	147000	2350000	660000	134000	173000
TA3	37400000	986	872	183	750000	123000	1170000	202000	158000	109000
TD3	24900000	1420	555	152	1290000	899000	1660000	3470000	175000	162000
TA4	26300000	1660	736	136	1480000	234000	1600000	2580000	186000	443000
TD4	43500000	1380	647	137	1890000	659000	1540000	175000	162000	437000
P-Value	0.002	0.0045	0.037	0.035	0.0255	0.0001	0.0405	0.0325	0.0421	0.0445
Note:
The sample names in the table represent the DNA samples of the corresponding groups.
The copy number of different functional genes represents the absolute number of copies per nanogram of DNA sample.
P-Value less than 0.05 means that there is a significant difference between the samples.
